# Supplementary material for: Comparative Study on Physicochemical and Nutritional Qualities of Kiwifruit Varieties
Source: MDPI journal article supplement (doi:10.3390/foods12010108), 2022-12-25
Supplement: s1 [file s1]

**Table S1. Quality prediction and evaluation results of 14 kiwifruits.**

| Varieties | PCA   |       |       |        | Rank |
|-----------|-------|-------|-------|--------|------|
|           | y1    | y2    | y3    | y      |      |
| R1        | -1.77 | 2.35  | 0.49  | -39.11 | 8    |
| R2        | -2.08 | 1.49  | -1.24 | -89.66 | 14   |
| G1        | -1.54 | 1.68  | 0.06  | -44.68 | 9    |
| G2        | -0.28 | 0.19  | 0.93  | -0.29  | 4    |
| G3        | -0.53 | -1.90 | 0.04  | -61.88 | 10   |
| G4        | -0.26 | 0.03  | 2.70  | 17.66  | 3    |
| G5        | 4.64  | 1.91  | -0.99 | 257.46 | 2    |
| G6        | 5.91  | -0.59 | 0.58  | 291.15 | 1    |
| Y1        | -1.71 | -0.67 | 0.91  | -88.06 | 12   |
| Y2        | -0.31 | 0.49  | -1.20 | -19.48 | 6    |
| Y3        | -0.29 | -0.94 | -0.16 | -34.02 | 7    |
| Y4        | -0.08 | -0.74 | -0.05 | -18.43 | 5    |
| Y5        | -0.45 | -2.42 | -1.20 | -81.32 | 11   |
| Y6        | -1.26 | -0.89 | -0.87 | -89.34 | 13   |

‘R1’, ‘Hongyang’. ‘R2’, ‘Donghong’. ‘G1’, ‘Cuiyu’. ‘G2’, ‘Xuxiang’. ‘G3’, ‘Hayward’. ‘G4’, ‘Jinkui’. ‘G5’, ‘MHYX’. ‘G6’, ‘Huate’. ‘Y1’, ‘Hort16A’. ‘Y2’, ‘G3’. ‘Y3’, ‘Jintao’. ‘Y4’, ‘Jinyuan’. ‘Y5’, ‘Jinmei’. ‘Y6’, ‘Jinyan’.
