# Supplementary material for: Comparative Study on Physicochemical and Nutritional Qualities of Kiwifruit Varieties
Source: MDPI journal article supplement (doi:10.3390/foods12010108), 2022-12-25
Supplement: s1 [file s1]

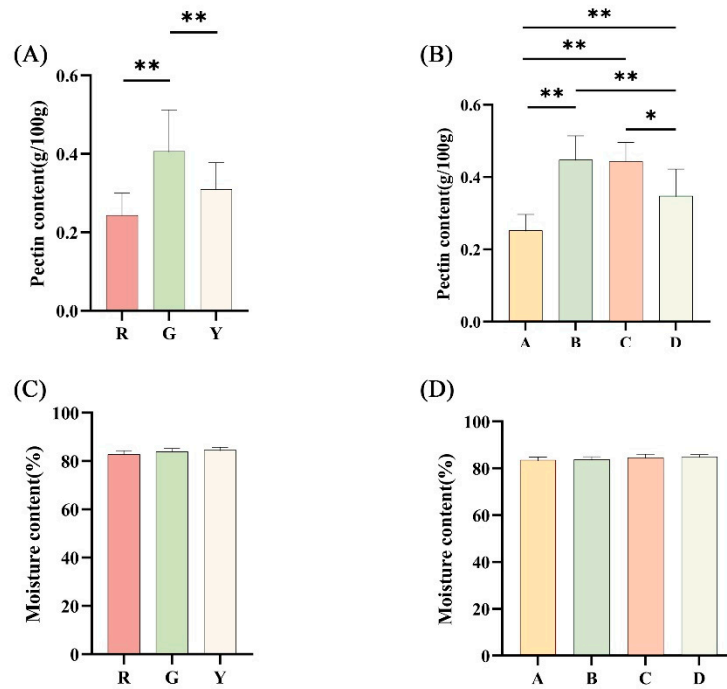

**Figure S1. Contents of pectin (A, B) and moisture (C, D).** The content in kiwifruits of 3 flesh color (A, C) and 4 species (B, D). ‘R’ the red-fleshed of kiwifruit. ‘G’ the green-fleshed of kiwifruit. ‘Y’ the yellow-fleshed of kiwifruit. ‘A’ *A.chinensis*. ‘B’ *A.chinensis* var. *deliciosa*. ‘C’ *A.eriantha*. ‘D’ *A.eriantha* × *A.chinensis*. Values are means ± SD of three individual biological reproductions. Statistical significance: ‘\*’  $P < 0.05$ ; ‘\*\*’  $P < 0.01$ .

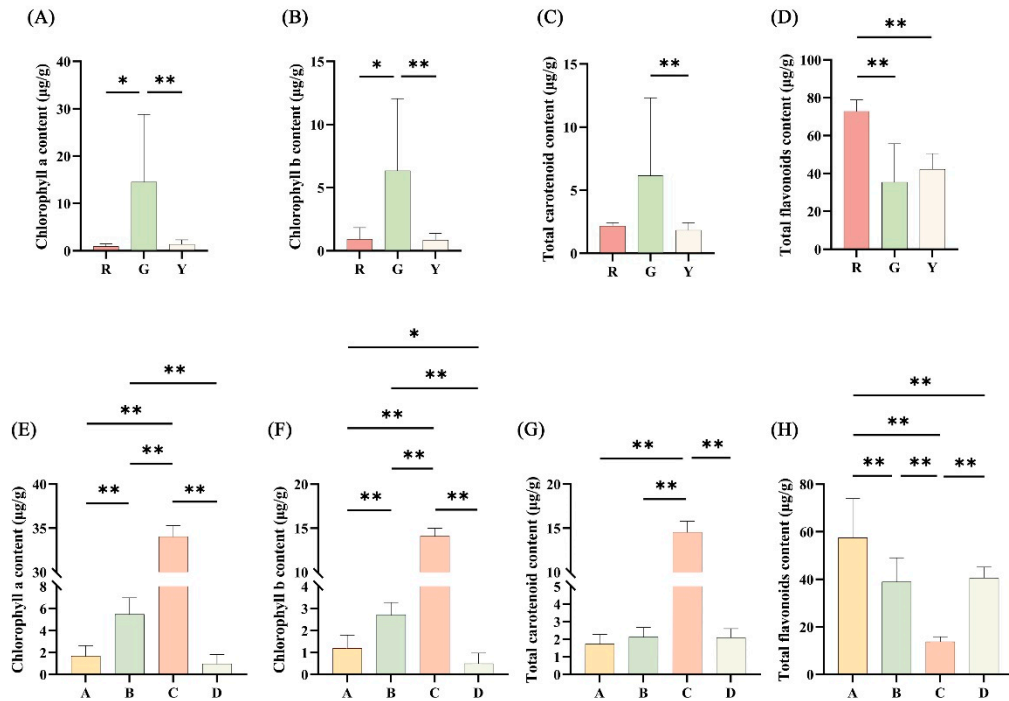

**Figure S2. Contents of chlorophyll a, chlorophyll b, total carotenoid and total flavonoids.** The content in kiwifruits of 3 flesh color (A-D) and 4 species (E-H). ‘R’ the red-fleshed of kiwifruit. ‘G’ the green-fleshed of kiwifruit. ‘Y’ the yellow-fleshed of kiwifruit. ‘A’ *A.chinensis*. ‘B’ *A.chinensis* var. *deliciosa*. ‘C’ *A.eriantha*. ‘D’ *A.eriantha*  $\times$  *A.chinensis*. Values are means  $\pm$  SD of three individual biological reproductions. Statistical significance: ‘\*’  $P < 0.05$ ; ‘\*\*’  $P < 0.01$ .
